# Supplementary material
Source: MDPI journal article supplement (https://www.mdpi.com/2410-3888/9/5/152)
Supplement: s1 [file s1]

## Supplementary Materials

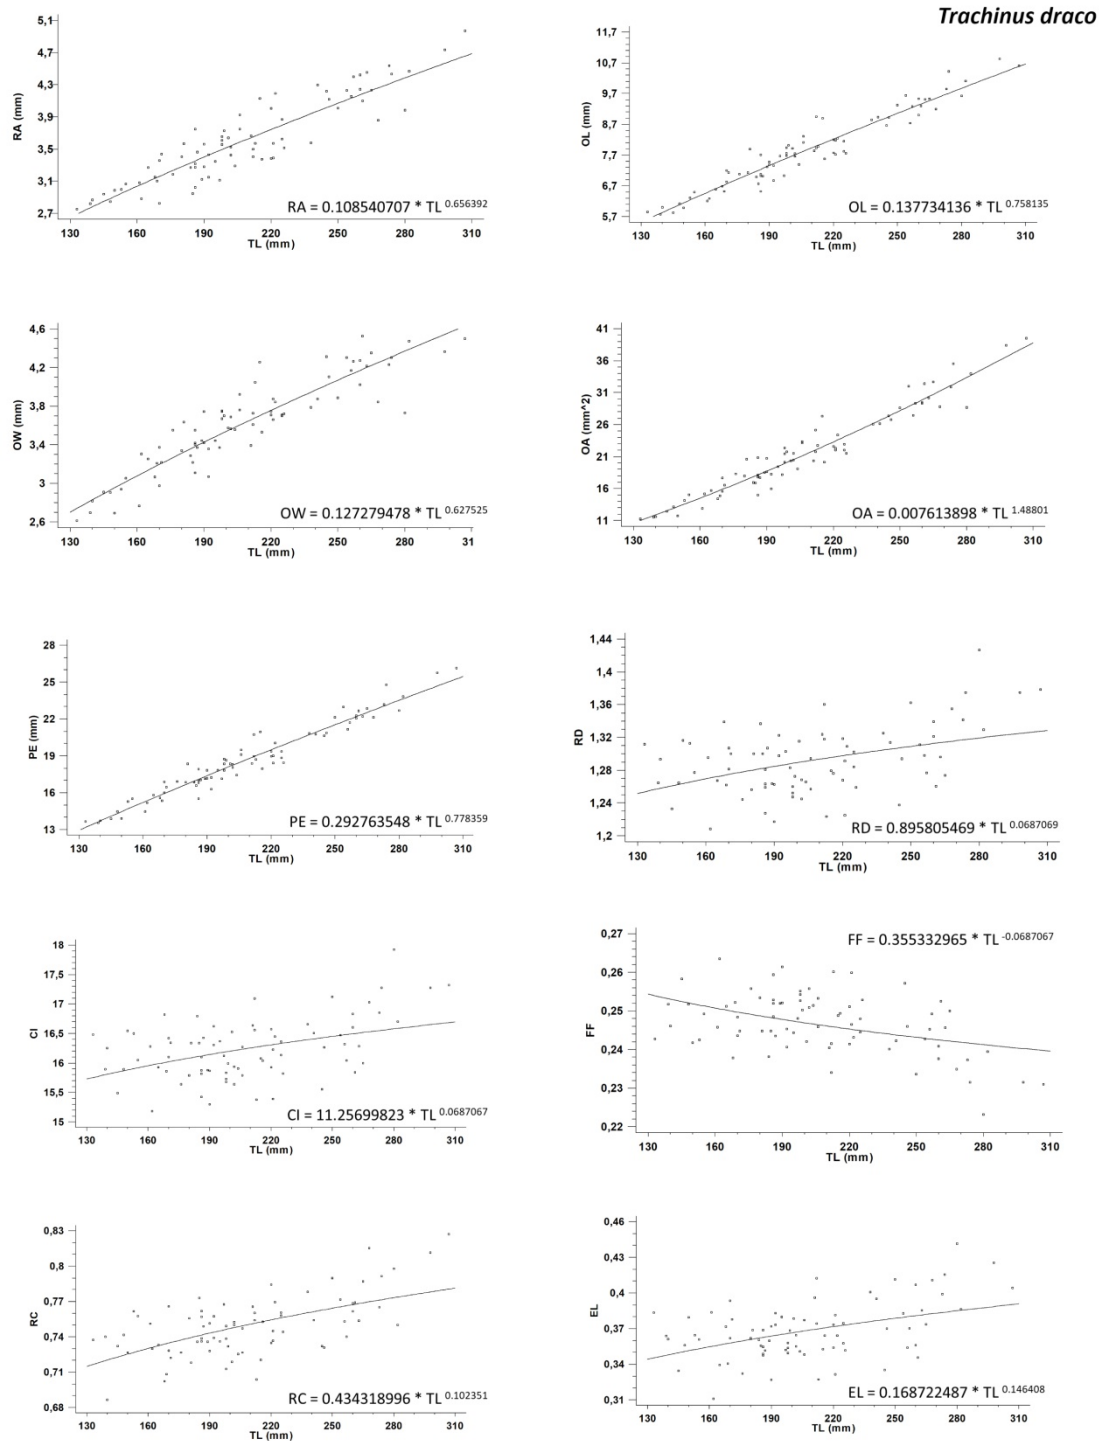

**Figure S1.** Exponential relationships of total length (mm) and otolith morphometric variables of *T. draco* for the southwestern Aegean Sea. *RA* (Radius, mm), *OL* (Otolith Length, mm), *OW* (Otolith Width, mm), *OA* (Otolith Area, mm<sup>2</sup>), *PE* (Perimeter, mm), *RD* (Roundness), *CI* (Circularity), *FF* (Form Factor), *RC* (Rectangularity) and *EL* (Ellipticity).

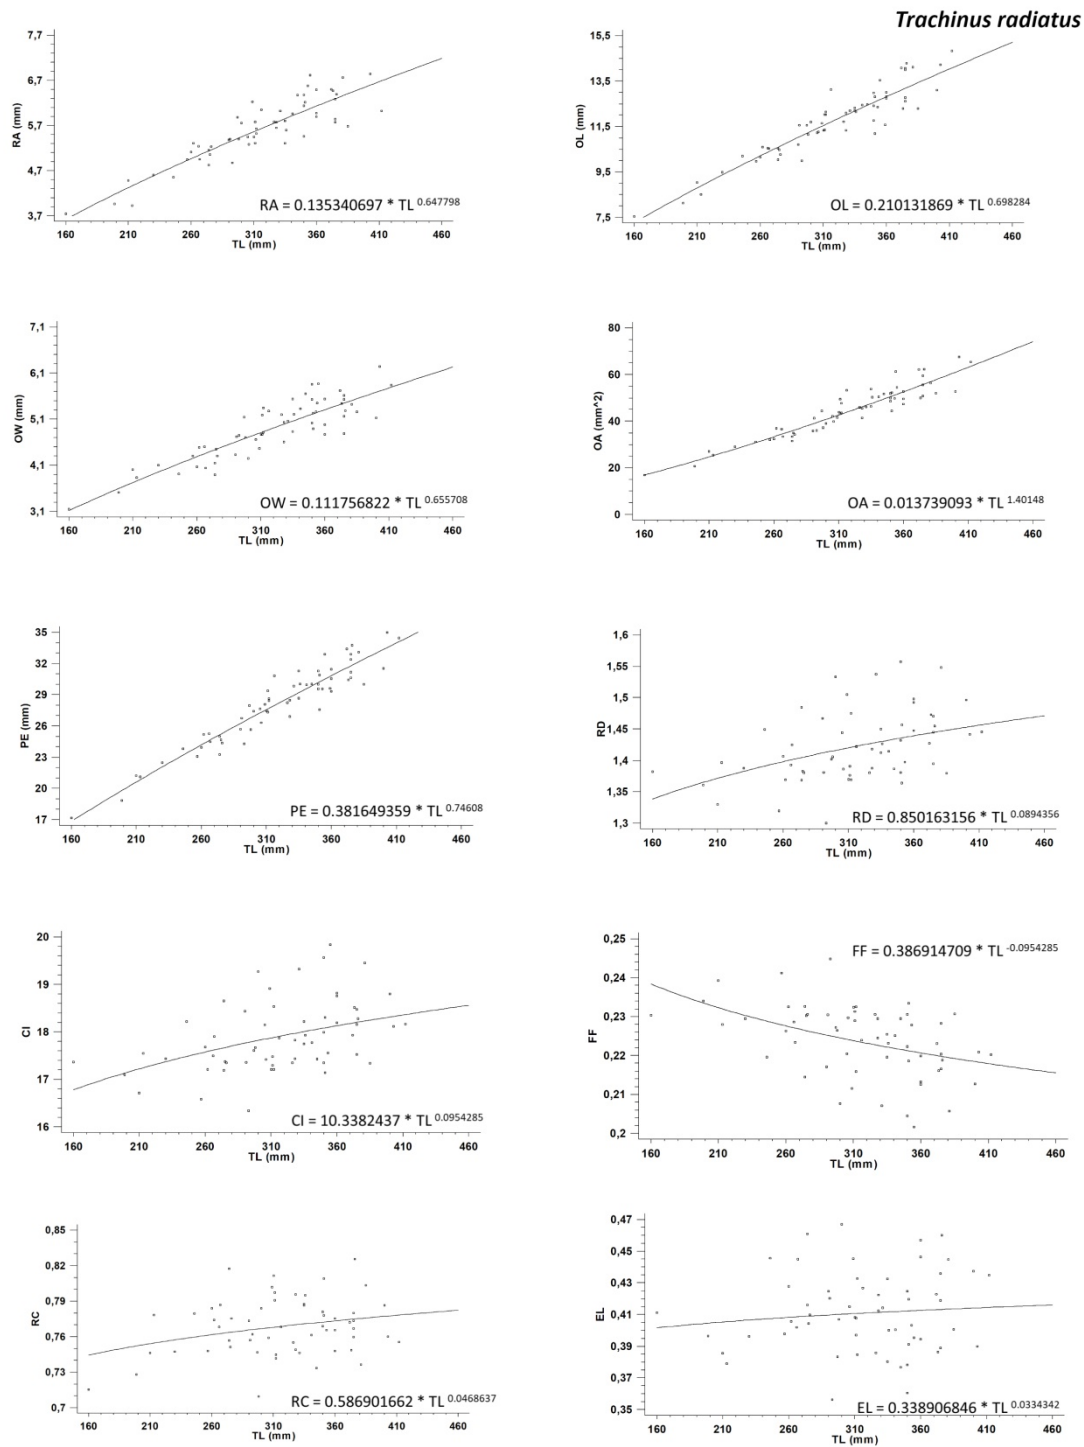

**Figure S2.** Exponential relationships of total length (mm) and otolith morphometric variables of *T. radiatus* for the southwestern Aegean Sea. *RA* (Radius, mm), *OL* (Otolith Length, mm), *OW* (Otolith Width, mm), *OA* (Otolith Area, mm<sup>2</sup>), *PE* (Perimeter, mm), *RD* (Roundness), *CI* (Circularity), *FF* (Form Factor), *RC* (Rectangularity) and *EL* (Ellipticity).
